# Supplementary material for: Sialome of a Generalist Lepidopteran Herbivore: Identification of Transcripts and Proteins from Helicoverpa armigera Labial Salivary Glands
Source: PubMed Central journal article supplement (PMC3203145; doi:10.1371/journal.pone.0026676), 2011-10-27
Supplement: pone.0026676.s003.pdf [file pone.0026676.s003.pdf]

| Contig ID           | Total no. of ESTs | Length (bp) | Description                                                       | Top BLAST hit (NR) |                            |           |
|---------------------|-------------------|-------------|-------------------------------------------------------------------|--------------------|----------------------------|-----------|
|                     |                   |             |                                                                   | Accession          | Organism                   | E-value   |
| Har-GLN_Contig_166  | 485               | 1059        | unknown protein [Helicoverpa armigera]                            | ABU98617           | Helicoverpa armigera       | 4.56E-155 |
| Har-GLN_Contig_721  | 228               | 1652        | juvenile hormone epoxide hydrolase                                | ACM78602           | Helicoverpa armigera       | 1.41E-133 |
| Har-GLN_Contig_1578 | 141               | 1868        | glucose dehydrogenase                                             | ACL36977           | Helicoverpa zea            | 0         |
| Har-GLN_Contig_1229 | 68                | 779         | elongation factor 1 alpha                                         | BAG30769           | Papilio xuthus             | 4.48E-134 |
| Har-GLN_Contig_1740 | 50                | 3085        | minor ampullate spidroin-like protein                             | ABR37276           | Nephilengys cruentata      | 7.81E-126 |
| Har-GLN_Contig_1068 | 48                | 807         | hypothetical protein                                              | XP_843140          | Leishmania major           | 4.49E-07  |
| Har-GLN_Contig_1935 | 46                | 1397        | hepatic triacylglycerol lipase                                    | ADA67928           | Bombyx mori                | 3.34E-61  |
| Har-GLN_Contig_1642 | 45                | 681         | cytochrome c oxidase subunit ii                                   | AAY54543           | Helicoverpa armigera       | 4.37E-113 |
| Har-GLN_Contig_639  | 44                | 770         | ribosomal protein l32                                             | Q962T1             | Spodoptera frugiperda      | 4.03E-71  |
| Har-GLN_Contig_949  | 43                | 1354        | serine protease inhibitor dipetalogastin (brasiliensin)           | ABI96910           | Triatoma brasiliensis      | 1.00E-54  |
| Har-GLN_Contig_858  | 41                | 1691        | sucrose-6-phosphate hydrolase (fructosidase)                      | ABU98615           | Helicoverpa armigera       | 0         |
| Har-GLN_Contig_1974 | 40                | 755         | autophagy related protein atg8                                    | NP_001040244       | Bombyx mori                | 3.63E-61  |
| Har-GLN_Contig_339  | 38                | 874         | signal peptidase 18 kda subunit                                   | NP_001040280       | Bombyx mori                | 1.47E-94  |
| Har-GLN_Contig_248  | 36                | 2455        | glucose oxidase                                                   | ACC94296           | Helicoverpa armigera       | 0         |
| Har-GLN_Contig_1343 | 34                | 844         | ribosomal protein s6                                              | Q95V32             | Spodoptera frugiperda      | 3.86E-137 |
| Har-GLN_Contig_362  | 33                | 541         | ribosomal protein l24                                             | Q962T5             | Spodoptera frugiperda      | 1.71E-82  |
| Har-GLN_Contig_676  | 32                | 547         | ribosomal protein l22                                             | AAK92160           | Spodoptera frugiperda      | 1.83E-79  |
| Har-GLN_Contig_1577 | 32                | 941         | fibroin p25 (silk protein)                                        | ACX50393           | Corcyra cephalonica        | 3.89E-67  |
| Har-GLN_Contig_2598 | 32                | 2504        | pe-pgrs family protein                                            | EFA85227           | Polysphondylium pallidum   | 1.82E-61  |
| Har-GLN_Contig_774  | 31                | 929         | ribosomal protein l7                                              | AAL62469           | Spodoptera frugiperda      | 2.49E-143 |
| Har-GLN_Contig_939  | 29                | 575         | ribosomal protein s18                                             | Q962R1             | Spodoptera frugiperda      | 4.51E-82  |
| Har-GLN_Contig_16   | 29                | 844         | serf-like protein                                                 | XP_002428430       | Pediculus humanus corporis | 7.05E-14  |
| Har-GLN_Contig_1995 | 29                | 505         | ribosomal protein s17                                             | NP_001037267       | Spodoptera frugiperda      | 3.55E-70  |
| Har-GLN_Contig_279  | 28                | 1355        | lipase 3                                                          | XP_973187          | Tribolium castaneum        | 3.67E-73  |
| Har-GLN_Contig_733  | 28                | 525         | ribosomal protein s24                                             | Q962Q6             | Spodoptera frugiperda      | 6.89E-70  |
| Har-GLN_Contig_39   | 28                | 685         | atp synthase delta mitochondrial                                  | NP_001093091       | Bombyx mori                | 1.03E-69  |
| Har-GLN_Contig_1449 | 28                | 639         | ribosomal protein l11                                             | ACY95309           | Manduca sexta              | 3.11E-107 |
| Har-GLN_Contig_98   | 28                | 884         | 40s ribosomal protein s3a                                         | Q95V35             | Spodoptera frugiperda      | 2.77E-149 |
| Har-GLN_Contig_1074 | 27                | 2677        | copia-type polyprotein                                            | BAA74713           | Bombyx mori                | 1.94E-125 |
| Har-GLN_Contig_238  | 27                | 1227        | glucosamine-6-phosphate n-acetyltransferase                       | NP_001040128       | Bombyx mori                | 8.93E-100 |
| Har-GLN_Contig_2104 | 27                | 452         | ribosomal protein l35                                             | NP_001037241       | Bombyx mori                | 6.27E-61  |
| Har-GLN_Contig_2594 | 26                | 1359        | ribosomal protein l3                                              | AAL62468           | Spodoptera frugiperda      | 0         |
| Har-GLN_Contig_758  | 26                | 1140        | bax inhibitor-1-like protein                                      | NP_001091820       | Bombyx mori                | 5.88E-111 |
| Har-GLN_Contig_750  | 26                | 589         | ribosomal protein l28                                             | Q962T2             | Spodoptera frugiperda      | 9.34E-70  |
| Har-GLN_Contig_534  | 26                | 750         | signal peptidase complex subunit 2                                | NP_001040214       | Bombyx mori                | 1.83E-89  |
| Har-GLN_Contig_2746 | 26                | 1089        | serine protease inhibitor dipetalogastin (brasiliensin)           | ABI96910           | Triatoma brasiliensis      | 1.39E-29  |
| Har-GLN_Contig_1644 | 26                | 669         | ribosomal protein l18a                                            | Q8WQI7             | Spodoptera frugiperda      | 2.91E-98  |
| Har-GLN_Contig_1291 | 26                | 1292        | nuclear excision repair protein rad23 homolog a                   | NP_001164652       | Bombyx mori                | 4.38E-137 |
| Har-GLN_Contig_409  | 26                | 1530        | cytochrome oxidase subunit i                                      | ABH07885           | Feltia jaculifera          | 0         |
| Har-GLN_Contig_550  | 25                | 2001        | oxidase peroxidase                                                | XP_311448          | Anopheles gambiae          | 2.46E-66  |
| Har-GLN_Contig_640  | 25                | 837         | translationally controlled tumor protein                          | NP_001037572       | Bombyx mori                | 1.33E-89  |
| Har-GLN_Contig_214  | 25                | 982         | selenoprotein m                                                   | XP_001600851       | Nasonia vitripennis        | 1.60E-18  |
| Har-GLN_Contig_857  | 25                | 1641        | sucrose-6-phosphate hydrolase (fructosidase)                      | ABU98615           | Helicoverpa armigera       | 0         |
| Har-GLN_Contig_628  | 25                | 1409        | mitochondrial porin                                               | XP_967480          | Tribolium castaneum        | 2.92E-105 |
| Har-GLN_Contig_1765 | 24                | 1389        | zinc transporter (catsup protein)                                 | XP_001849361       | Culex quinquefasciatus     | 2.59E-106 |
| Har-GLN_Contig_1168 | 24                | 657         | ribosomal protein l12                                             | AAL26576           | Spodoptera frugiperda      | 4.17E-86  |
| Har-GLN_Contig_1427 | 24                | 716         | ribosomal protein l19                                             | ACY95336           | Manduca sexta              | 7.95E-108 |
| Har-GLN_Contig_234  | 22                | 590         | ribosomal protein l26e                                            | AAK92162           | Spodoptera frugiperda      | 4.63E-77  |
| Har-GLN_Contig_1245 | 22                | 537         | ribosomal protein l27                                             | ABS57452           | Heliconius melpomene       | 3.16E-73  |
| Har-GLN_Contig_1    | 22                | 810         | cytochrome oxidase subunit iii                                    | ABN04114           | Spodoptera exigua          | 5.17E-120 |
| Har-GLN_Contig_847  | 22                | 2333        | protein disulfide isomerase                                       | NP_001037171       | Bombyx mori                | 0         |
| Har-GLN_Contig_2788 | 22                | 500         | ribosomal protein l23                                             | NP_001037227       | Bombyx mori                | 1.92E-73  |
| Har-GLN_Contig_918  | 22                | 861         | coagulin                                                          | BAH70732           | Acyrtosiphon pisum         | 4.45E-11  |
| Har-GLN_Contig_622  | 22                | 865         | ribosomal protein l8                                              | NP_001037141       | Bombyx mori                | 8.68E-148 |
| Har-GLN_Contig_1407 | 21                | 597         | promoting protein                                                 | NP_001037199       | Bombyx mori                | 4.16E-20  |
| Har-GLN_Contig_1414 | 21                | 912         | proteasome beta subunit                                           | ACJ13433           | Helicoverpa armigera       | 3.07E-130 |
| Har-GLN_Contig_222  | 21                | 804         | ribosomal protein l13                                             | AAV91770           | Helicoverpa zea            | 4.99E-123 |
| Har-GLN_Contig_883  | 21                | 1307        | glyceraldehyde-3-phosphate dehydrogenase                          | BAE96011           | Bombyx mori                | 1.62E-179 |
| Har-GLN_Contig_742  | 21                | 2104        | glucosidase 2 subunit beta                                        | XP_974655          | Tribolium castaneum        | 1.60E-148 |
| Har-GLN_Contig_863  | 21                | 927         | eukaryotic translation initiation factor 1a                       | NP_001093083       | Bombyx mori                | 1.07E-77  |
| Har-GLN_Contig_2804 | 21                | 1855        | protein disulfide-isomerase like protein erp57                    | BAD93613           | Bombyx mori                | 0         |
| Har-GLN_Contig_2651 | 21                | 770         | nadh:ubiquinone dehydrogenase                                     | XP_001663929       | Aedes aegypti              | 7.89E-59  |
| Har-GLN_Contig_511  | 21                | 844         | no hit                                                            | na                 | na                         | na        |
| Har-GLN_Contig_123  | 20                | 936         | ribosomal protein l7a                                             | ABX5885            | Spodoptera exigua          | 4.93E-147 |
| Har-GLN_Contig_2631 | 20                | 618         | ribosomal protein s19                                             | AAK92188           | Spodoptera frugiperda      | 2.96E-80  |
| Har-GLN_Contig_932  | 20                | 2025        | ac1147-like protein                                               | NP_001020173       | Rattus norvegicus          | 1.03E-36  |
| Har-GLN_Contig_508  | 20                | 645         | immune reactive putative protease inhibitor (cysteine-rich venom) | ABK29470           | Helicoverpa armigera       | 2.84E-39  |
| Har-GLN_Contig_966  | 20                | 747         | transmembrane emp24 protein (glycoprotein 25l)                    | NP_001040538       | Bombyx mori                | 6.08E-109 |
| Har-GLN_Contig_790  | 20                | 741         | ribosomal protein l10a                                            | Q963B6             | Spodoptera frugiperda      | 6.37E-119 |
| Har-GLN_Contig_1039 | 20                | 614         | ribosomal protein s27                                             | AAK92195           | Spodoptera frugiperda      | 2.60E-44  |
| Har-GLN_Contig_630  | 20                | 741         | ribosomal protein l24                                             | ACY95333           | Manduca sexta              | 4.15E-102 |
| Har-GLN_Contig_994  | 20                | 621         | ribosomal protein s23                                             | Q6EV23             | Spodoptera frugiperda      | 3.67E-78  |
| Har-GLN_Contig_2670 | 20                | 974         | nascent polypeptide associated complex protein alpha subunit      | NP_001040365       | Bombyx mori                | 1.59E-103 |
| Har-GLN_Contig_948  | 20                | 1304        | serine protease inhibitor dipetalogastin (brasiliensin)           | ABI96910           | Triatoma brasiliensis      | 1.46E-55  |
| Har-GLN_Contig_390  | 20                | 790         | cyclophilin a                                                     | BAD90848           | Bombyx mori                | 1.46E-79  |
| Har-GLN_Contig_2044 | 20                | 1265        | putative secreted protein                                         | ABI52743           | Argas monolakensis         | 1.41E-23  |
| Har-GLN_Contig_625  | 20                | 808         | succinate dehydrogenase                                           | XP_971814          | Tribolium castaneum        | 3.53E-28  |
| Har-GLN_Contig_2312 | 20                | 1331        | farnesoic acid o-methyltransferase-like                           | XP_974395          | Tribolium castaneum        | 6.38E-30  |
| Har-GLN_Contig_2611 | 19                | 648         | eukaryotic translation initiation factor 6                        | ABB92838           | Spodoptera frugiperda      | 3.57E-98  |
| Har-GLN_Contig_18   | 19                | 1112        | metallothionein b                                                 | XP_002013344       | Drosophila persimilis      | 5.49E-05  |
| Har-GLN_Contig_813  | 19                | 1032        | ribosomal protein l5                                              | ACY95338           | Manduca sexta              | 8.86E-164 |
| Har-GLN_Contig_355  | 19                | 1012        | tgf beta-inducible nuclear protein 1                              | ABD36171           | Bombyx mori                | 2.19E-143 |
| Har-GLN_Contig_1337 | 19                | 914         | endopeptidase inhibitor-like                                      | CBH09269           | Heliconius melpomene       | 4.06E-82  |
| Har-GLN_Contig_1863 | 19                | 1756        | calreticulin                                                      | BAC57964           | Bombyx mori                | 0         |
| Har-GLN_Contig_404  | 19                | 757         | Yipf6 protein                                                     | NP_001040374       | Bombyx mori                | 2.26E-111 |
| Har-GLN_Contig_787  | 19                | 2031        | dentin sialophosphoprotein                                        | ACN91278           | Canis lupus                | 6.01E-44  |
| Har-GLN_Contig_1774 | 19                | 2051        | putative ecdysone oxidase (glucose dehydrogenase)                 | CBH09301           | Heliconius melpomene       | 1.86E-93  |
| Har-GLN_Contig_1782 | 19                | 617         | ribosomal protein s27a                                            | AAL62473           | Spodoptera frugiperda      | 1.38E-85  |
| Har-GLN_Contig_1443 | 19                | 1949        | antennal esterase CXE3                                            | ACV60230           | Spodoptera littoralis      | 3.98E-130 |
| Har-GLN_Contig_343  | 18                | 828         | chemosensory protein                                              | ACX53817           | Heliothis virescens        | 1.61E-47  |
| Har-GLN_Contig_2741 | 18                | 2124        | argonaute 2                                                       | NP_001036995       | Bombyx mori                | 7.46E-69  |
| Har-GLN_Contig_1527 | 18                | 662         | sec61 beta subunit                                                | NP_001037632       | Bombyx mori                | 8.91E-44  |
| Har-GLN_Contig_1148 | 18                | 896         | histone deacetylase                                               | XP_002427086       | Pediculus humanis corporis | 6.56E-29  |
| Har-GLN_Contig_1613 | 18                | 873         | mki67 (fha domain) interacting nucleolar phosphoprotein           | NP_001037642       | Bombyx mori                | 8.66E-71  |
| Har-GLN_Contig_1741 | 18                | 577         | ribosomal protein s13                                             | Q962R6             | Spodoptera frugiperda      | 3.28E-80  |
| Har-GLN_Contig_1235 | 18                | 574         | ribosomal protein l36                                             | AAK92170           | Spodoptera frugiperda      | 9.77E-61  |
| Har-GLN_Contig_1683 | 18                | 747         | cuticular protein analogous to peritrophins 3-e                   | XP_001603894       | Nasonia vitripennis        | 3.49E-64  |
| Har-GLN_Contig_1705 | 17                | 839         | proteasome subunit beta type-6 precursor                          | XP_973571          | Tribolium castaneum        | 5.74E-101 |
| Har-GLN_Contig_953  | 17                | 877         | ribosomal protein s2                                              | AAN86048           | Spodoptera frugiperda      | 2.74E-149 |
| Har-GLN_Contig_1744 | 17                | 1287        | oxidase/peroxidase                                                | XP_001657372       | Aedes aegypti              | 4.95E-48  |
