# Supplementary material for: Sialome of a Generalist Lepidopteran Herbivore: Identification of Transcripts and Proteins from Helicoverpa armigera Labial Salivary Glands
Source: PubMed Central journal article supplement (PMC3203145; doi:10.1371/journal.pone.0026676), 2011-10-27
Supplement: pone.0026676.s005.pdf [file pone.0026676.s005.pdf]

| spot | GenBank accession <sup>a</sup> | Description <sup>a</sup>                                                           | organism <sup>b</sup>              | predicted MW <sup>c</sup> | peptide hits MS blast <sup>d</sup> | MS BLAST score <sup>e</sup> |
|------|--------------------------------|------------------------------------------------------------------------------------|------------------------------------|---------------------------|------------------------------------|-----------------------------|
| 1    | ACL36977.1                     | putative ecdysone oxidase                                                          | <i>Helicoverpa zea</i>             | 63,8                      | 3                                  | 181                         |
| 2    | EDV38464.1                     | GF19436                                                                            | <i>Drosophila ananassae</i>        | 132,8                     | 8                                  | 431                         |
| 3    | ACC94296.1                     | glucose oxidase-like enzyme                                                        | <i>Helicoverpa armigera</i>        | 66,9                      | 19                                 | 1152                        |
| 4    | BAI49425.1                     | neuroglian                                                                         | <i>Mythimna separata</i>           | 140                       | 7                                  | 375                         |
| 5    | XP_001603338.1                 | PREDICTED: hypothetical protein                                                    | <i>Nasonia vitripennis</i>         | 76,1                      | 1                                  | 67                          |
| 6    | XP_001946039.1                 | PREDICTED: similar to AGAP008350-PA                                                | <i>Acyrtosiphon pisum</i>          | 154,1                     | 7                                  | 297                         |
| 7    | XP_311557.4                    | AGAP010390-PA                                                                      | <i>Anopheles gambiae str. PEST</i> | 81,9                      | 3                                  | 276                         |
| 8    | XP_002031106.1                 | GM24208                                                                            | <i>Drosophila sechellia</i>        | 71                        | 13                                 | 884                         |
| 9    | ABU98615.1                     | fructosidase                                                                       | <i>H. armigera</i>                 | 54                        | 10                                 | 712                         |
| 10   | ACI32835.1                     | serine proteinase-like protein 1                                                   | <i>H. armigera</i>                 | 46,5                      | 5                                  | 388                         |
| 11   | ABU98615.1                     | Fructosidase                                                                       | <i>H. armigera</i>                 | 54                        | 11                                 | 693                         |
| 12   | ABU98617.1                     | unknown                                                                            | <i>H. armigera</i>                 | 29,9                      | 6                                  | 391                         |
| 13   | ABV74209.1                     | serpin-6                                                                           | <i>Bombyx mori</i>                 | 46,4                      | 5                                  | 323                         |
| 14   | ABW03226.1                     | beta actin                                                                         | <i>Xestia c-nigrum</i>             | 41,8                      | 7                                  | 442                         |
| 15   | EAL40833.3                     | AGAP002826-PA                                                                      | <i>A. gambiae str. PEST</i>        | 23,2                      | 1                                  | 67                          |
| 16   | ACT80221.1                     | ATP synthase FO subunit 6                                                          | <i>Mayetiola destructor</i>        | 25,8                      | 3                                  | 126                         |
| 17   | AAK52495.1                     | AF361483_1 chymotrypsin inhibitor Cl-8A                                            | <i>B. mori</i>                     | 43,8                      | 5                                  | 292                         |
| 18   | BAG38534.1                     | 14-3-3 epsilon                                                                     | <i>B. mori</i>                     | 29,6                      | 6                                  | 398                         |
| 19   | AAA68242.1                     | juvenile hormone binding protein                                                   | <i>Heliothis virescens</i>         | 26,8                      | 4                                  | 224                         |
| 20   | EDS42418.1                     | conserved hypothetical protein                                                     | <i>D. erecta</i>                   | 16,8                      | 9                                  | 301                         |
| 21   | ACR07788.1                     | 14-3-3 zeta                                                                        | <i>H. virescens</i>                | 28                        | 12                                 | 796                         |
| 22   | XP_973769.1                    | PREDICTED: similar to Elongation factor 1 beta CG6341-PA                           | <i>Tribolium castaneum</i>         | 29,2                      | 4                                  | 221                         |
| 23   | XP_973117.1                    | PREDICTED: similar to proteasome zeta subunit                                      | <i>T. castaneum</i>                | 26,4                      | 2                                  | 198                         |
| 24   | XP_002429704.1                 | glucose dehydrogenase, putative                                                    | <i>Pediculus humanus corporis</i>  | 73,7                      | 2                                  | 121                         |
| 25   | XP_001943976.1                 | PREDICTED: similar to viral A-type                                                 | <i>A. pisum</i>                    | 199,8                     | 4                                  | 179                         |
| 26   | XP_395299.2                    | PREDICTED: similar to Translationally controlled tumor protein CG4800-PA isoform 1 | <i>Apis mellifera</i>              | 19,7                      | 4                                  | 339                         |
| 27   | AAB32409.1                     | 18 kda serine proteinase inhibitor                                                 | <i>H. zea</i>                      | 3                         | 1                                  | 63                          |
| 28   | EAT44854.1                     | initiation factor 5a                                                               | <i>Aedes aegypti</i>               | 17,5                      | 2                                  | 115                         |
| 29   | EDW67351.1                     | GJ23129                                                                            | <i>Drosophila virilis</i>          | 110,4                     | 1                                  | 68                          |
| 30   | ABU98615.2                     | Fructosidase                                                                       | <i>H. armigera</i>                 | 54                        | 1                                  | 68                          |
| 31   | P82171.1                       | CU095_LOCM1 RecName: Full=Cuticle protein 9.5;                                     | <i>Locusta migratoria</i>          | 9,5                       | 5                                  | 187                         |
| 32   | ABB04499.1                     | SUMO                                                                               | <i>B. mori</i>                     | 10,3                      | 2                                  | 112                         |
| 33   | ABC96694.1                     | yellow-d                                                                           | <i>B. mori</i>                     | 50,3                      | 4                                  | 503                         |
| 34   | XP_001649322.1                 | proacrosin, putative                                                               | <i>A. aegypti</i>                  | 42                        | 4                                  | 212                         |
| 35   | ABX57148.1                     | arginine kinase                                                                    | <i>Archicaris parthenias</i>       | 22,6                      | 16                                 | 822                         |
| 36   | ABX57154.1                     | arginine kinase                                                                    | <i>Macrosoma tipulata</i>          | 22,6                      | 7                                  | 445                         |
| 37   | ACI32835.1                     | serine proteinase-like protein 1                                                   | <i>H. armigera</i>                 | 46,5                      | 9                                  | 725                         |
| 38   | CAC88582.1                     | unnamed protein product                                                            | <i>H. virescens</i>                | 32                        | 8                                  | 562                         |
| 39   | C1JE15.1                       | SCLXB_HELVI RecName: Full=Scolexin B; Flags:                                       | <i>H. virescens</i>                | 30,5                      | 6                                  | 306                         |
| 40   | EDW90053.1                     | GE13058                                                                            | <i>Drosophila yakuba</i>           | 62                        | 2                                  | 113                         |
| 41   | NP_001155191.1                 | silk gland derived serine protease                                                 | <i>B. mori</i>                     | 42                        | 6                                  | 276                         |
| 42   | ABM90638.1                     | 6-phosphogluconolactonase                                                          | <i>B. mori</i>                     | 25,9                      | 3                                  | 182                         |
| 43   | XP_002007655.1                 | G112260                                                                            | <i>Drosophila mojavensis</i>       | 29                        | 3                                  | 148                         |
| 44   | XP_002093710.1                 | GE20611                                                                            | <i>D. yakuba</i>                   | 43,8                      | 6                                  | 265                         |
| 45   | XP_968982.1                    | PREDICTED: similar to AGAP001957-PA                                                | <i>T. castaneum</i>                | 31,3                      | 6                                  | 311                         |
| 46   | CAA72953.1                     | diverged serine protease                                                           | <i>H. armigera</i>                 | 27,3                      | 2                                  | 171                         |
| 47   | ACV89326.1                     | triosephosphate isomerase                                                          | <i>Nigroria sp.</i>                | 17,5                      | 2                                  | 121                         |
| 48   | ABW96360.1                     | thioredoxin peroxidase                                                             | <i>H. armigera</i>                 | 21,9                      | 6                                  | 521                         |
| 49   | XP_001866830.1                 | conserved hypothetical protein                                                     | <i>Culex pipiens</i>               | 19                        | 5                                  | 279                         |
| 50   | AAR09835.1                     | similar to Drosophila melanogaster tsr                                             | <i>D. yakuba</i>                   | 17,1                      | 7                                  | 443                         |
| 51   | XP_001985637.1                 | GH17180                                                                            | <i>Drosophila grimshawi</i>        | 207,9                     | 2                                  | 160                         |
| 52   | NP_001093087.1                 | mobility group protein 1B                                                          | <i>B. mori</i>                     | 13,3                      | 1                                  | 95                          |
| 53   | XP_394370.1                    | PREDICTED: similar to CG5255-PA                                                    | <i>Apis mellifera</i>              | 28                        | 2                                  | 113                         |
| 54   | AAM53644.1                     | abnormal wing disc-like protein                                                    | <i>Choristoneura parallela</i>     | 17                        | 8                                  | 574                         |
| 55   | EDV53781.1                     | GG11332                                                                            | <i>Drosophila erecta</i>           | 63,2                      | 1                                  | 86                          |
| 56   | CAB55605.1                     | arylphorin subunit                                                                 | <i>Spodoptera litura</i>           | 84,1                      | 6                                  | 355                         |
| 57   | CAB55605.1                     | arylphorin subunit                                                                 | <i>S. litura</i>                   | 84,1                      | 7                                  | 416                         |
| 58   | BAD12426.1                     | fructose 1,6-bisphosphate aldolase                                                 | <i>Antheraea yamamai</i>           | 39,7                      | 10                                 | 660                         |
| 59   | ABU98615.1                     | fructosidase                                                                       | <i>H. armigera</i>                 | 54                        | 4                                  | 270                         |
| 60   | AAU95199.1                     | putative glyceraldehyde-3-phosphate dehydrogenase                                  | <i>Oncometopia nigricans</i>       | 35,6                      | 7                                  | 399                         |
| 61   | ABV60323.1                     | putative glyceraldehyde-3-phosphate dehydrogenase                                  | <i>Lutzomyia longipalpis</i>       | 35,2                      | 7                                  | 485                         |
| 62   | XP_002423913.1                 | GTP-binding nuclear protein RAN1, putative                                         | <i>Pediculus humanus corporis</i>  | 49,7                      | 5                                  | 351                         |
| 63   | ABK29488.1                     | promoting protein                                                                  | <i>H. armigera</i>                 | 8,4                       | 2                                  | 146                         |
| 64   | XP_001119897.1                 | PREDICTED: similar to Cyclophilin 1                                                | <i>A. mellifera</i>                | 17,8                      | 6                                  | 305                         |
| 65   | ACD69576.1                     | peptidyl-prolyl isomerase-1                                                        | <i>Gryllus pennsylvanicus</i>      | 17,9                      | 3                                  | 149                         |
