# Supplementary material for: Sialome of a Generalist Lepidopteran Herbivore: Identification of Transcripts and Proteins from Helicoverpa armigera Labial Salivary Glands
Source: PubMed Central journal article supplement (PMC3203145; doi:10.1371/journal.pone.0026676), 2011-10-27
Supplement: pone.0026676.s006.pdf [file pone.0026676.s006.pdf]

| spot | hits <sup>a</sup> | aa <sup>b</sup> | MW <sup>c</sup> | pI <sup>d</sup> | blastp vs UniRef100 <sup>e</sup>                                 | UniRef100 <sup>f</sup> | species <sup>g</sup>              | E-value <sup>h</sup> | Signal peptide probability <sup>i</sup> |
|------|-------------------|-----------------|-----------------|-----------------|------------------------------------------------------------------|------------------------|-----------------------------------|----------------------|-----------------------------------------|
| 1    | 4                 | 581             | 63283           | 4,87            | Putative ecdysone oxidase                                        | B8Y866                 | <i>Heliothis zea</i>              | 0.0                  | 0,525                                   |
| 2    | 11                | 213             | 23353,09        | 4,92            | Putative ecdysone oxidase                                        | B8Y866                 | <i>Heliothis zea</i>              | 3 e-26               | 0,002                                   |
| 3    | 10                | 278             | 31006,38        | 5,26            | Glucose oxidase-like enzyme                                      | B2MW81                 | <i>Helicoverpa armigera</i>       | 1 e-161              | 0,001                                   |
| 4    | 3                 | 77              | 8838,99         | 5,81            | Glucose dehydrogenase                                            | Q17DW2                 | <i>Aedes aegypti</i>              | 1 e-5                | 0                                       |
| 5    | 4                 | 244             | 27755,13        | 4,78            | Oxidase/peroxidase                                               | Q177U0                 | <i>Aedes aegypti</i>              | 1 e-34               | 0                                       |
| 6    | 6                 | 244             | 27755,13        | 4,78            | Oxidase/peroxidase                                               | Q177U0                 | <i>Aedes aegypti</i>              | 1 e-34               | 0                                       |
| 7    | 7                 | 372             | 42093,05        | 4,87            | Antennal esterase CXE3                                           | D3GDL4                 | <i>Spodoptera littoralis</i>      | 7 e-76               | 0                                       |
| 8    | 6                 | 170             | 18693,57        | 7,68            | Heat shock cognate 70 protein                                    | Q0MUU7                 | <i>Trichoplusia ni</i>            | 7 e-89               | 0,983                                   |
| 9    | 11                | 366             | 41117,33        | 4,91            | Fructosidase                                                     | B1NLD5                 | <i>Helicoverpa armigera</i>       | 0.0                  | 0,98                                    |
| 10   | 9                 | 458             | 51656,67        | 5               | Juvenile hormone epoxide hydrolase                               | C0KH33                 | <i>Helicoverpa armigera</i>       | 1 e-132              | 0,98                                    |
| 11   | 12                | 458             | 51656,67        | 5               | Fructosidase                                                     | B1NLD5                 | <i>Helicoverpa armigera</i>       | 0.0                  | 0,98                                    |
| 12   | 5                 | 300             | 33463,69        | 4,5             | Putative uncharacterized protein                                 | B1NLD7                 | <i>Helicoverpa armigera</i>       | 1 e-155              | 0,999                                   |
| 13   | 5                 | 154             | 17156,75        | 5,34            | Chymotrypsin inhibitor CI-8A                                     | Q967V9                 | <i>Bombyx mori</i>                | 2 e-56               | 0,001                                   |
| 14   | 5                 | 359             | 39854,99        | 5,29            | Actin-A3b, cytoplasmic                                           | P84184                 | <i>Helicoverpa armigera</i>       | 0.0                  | 0                                       |
| 15   | 4                 | 275             | 30755,66        | 7,81            | Ubiquitin MGC53081 protein                                       | Q7ZYG5                 | <i>Xenopus laevis</i>             | 1 e-146              | 0,003                                   |
| 16   | 2                 | 158             | 18399,78        | 10,81           | Predicted protein                                                | A7SI41                 | <i>Nematostella vectensis</i>     | 0,004                | 0,527                                   |
| 17   | 3                 | 300             | 33463,69        | 4,5             | Putative uncharacterized protein                                 | B1NLD7                 | <i>Helicoverpa armigera</i>       | 1 e-155              | 0,999                                   |
| 18   | 3                 | 197             | 21414,04        | 4,72            | Elongation factor 1 delta                                        | Q9BPS1                 | <i>Bombyx mori</i>                | 8 e-76               | 0                                       |
| 19   | 4                 | 458             | 51656,67        | 5               | Fructosidase                                                     | B1NLD5                 | <i>Helicoverpa armigera</i>       | 0.0                  | 0,98                                    |
| 20   | 9                 | 242             | 26991,42        | 5,28            | Juvenile hormone binding protein                                 | Q25175                 | <i>Heliothis virescens</i>        | 5 e-80               | 0,997                                   |
| 21   | 12                | 247             | 28071,68        | 4,84            | 14-3-3 zeta protein domain specific binding                      | C4NFK6                 | <i>Heliothis virescens</i>        | 1 e-135              | 0                                       |
| 22   | 4                 | 223             | 24574,59        | 4,52            | Elongation factor 1 beta <sup>1</sup>                            | A9LSA6                 | <i>Spodoptera exigua</i>          | 1 e-116              | 0                                       |
| 23   | 2                 | 160             | 17624,24        | 4,76            | Proteasome subunit alpha type                                    | Q2F661                 | <i>Bombyx mori</i>                | 1 e-84               | 0                                       |
| 24   | 1                 | 213             | 23353,09        | 4,92            | Putative ecdysone oxidase                                        | B8Y866                 | <i>Heliothis zea</i>              | 3 e-26               | 0,002                                   |
| 25   | 5                 | 54              | 6160,88         | 4,9             | ni                                                               | -                      | -                                 | -                    | 0                                       |
| 26   | 4                 | 172             | 19761,68        | 4,71            | Translationally-controlled tumor protein homolog                 | Q75VN3                 | <i>Bombyx mori</i>                | 4 e-90               | 0                                       |
| 27   | 1                 | 178             | 19137,96        | 5,16            | Brasiliensin protease inhibitor                                  | A7YIH7                 | <i>Triatoma brasiliensis</i>      | 3 e-30               | 1,00                                    |
| 28   | 2                 | 160             | 17524,84        | 5,16            | Eukaryotic translation initiation factor 5A                      | P62925                 | <i>Spodoptera frugiperda</i>      | 1 e-89               | 0                                       |
| 29   | 2                 | -               | -               | -               | ni                                                               | -                      | -                                 | -                    | -                                       |
| 30   | 1                 | 458             | 45626,95        | 4,17            | Dentin sialophosphoprotein                                       | C9W8D1                 | <i>Odocoileus virginianus</i>     | 8 e-30               | 1,00                                    |
| 31   | 3                 | -               | -               | -               | ni                                                               | -                      | -                                 | -                    | -                                       |
| 32   | 2                 | 91              | 10295,64        | 5,29            | Small ubiquitin-like modifier proteinUbiquitin-like protein SMT3 | Q2VEW6                 | <i>Bombyx mori</i>                | 1 e-43               | 0                                       |
| 33   | 8                 | 233             | 26374,86        | 6,59            | Yellow-d storage protein                                         | Q2HZG6                 | <i>Bombyx mori</i>                | 3 e-98               | 0,001                                   |
| 34   | 1                 | -               | -               | -               | ni                                                               | -                      | -                                 | -                    | -                                       |
| 35   | 11                | 226             | 25793,39        | 6,09            | Arginine kinase                                                  | D3Y4D1                 | <i>Helicoverpa armigera</i>       | 1 e-129              | 0                                       |
| 36   | 7                 | 226             | 25793,39        | 6,09            | Arginine kinase                                                  | D3Y4D1                 | <i>Helicoverpa armigera</i>       | 1 e-129              | 0                                       |
| 37   | 2                 | 183             | 19606,31        | 4,79            | Serine proteinase-like protein 1                                 | B7SVM2                 | <i>Helicoverpa armigera</i>       | 1 e-105              | 0,995                                   |
| 38   | 4                 | 242             | 26580,18        | 5,7             | Juvenile hormone binding protein                                 | Q25175                 | <i>Heliothis virescens</i>        | 1 e-106              | 0,998                                   |
| 39   | 7                 | 257             | 27377,98        | 5,61            | Scolexin B serine endopeptidase                                  | C1JE15                 | <i>Heliothis virescens</i>        | 1 e-134              | 1,00                                    |
| 40   | 8                 | 242             | 26580,18        | 5,7             | Juvenile hormone binding protein                                 | Q25175                 | <i>Heliothis virescens</i>        | 1 e-106              | 0,998                                   |
| 41   | 5                 | 394             | 42816,81        | 7,35            | Trypsin-like proteinase T2a                                      | Q6RS59                 | <i>Ostrinia nubilalis</i>         | 1 e-145              | 1,00                                    |
| 42   | 4                 | 214             | 23732,44        | 4,92            | 6-phosphogluconolactonase                                        | A2TF14                 | <i>Bombyx mori</i>                | 3 e-75               | 0                                       |
| 43   | 4                 | 156             | 17435,3         | 8,4             | ACYPI005456 protein                                              | C4WU27                 | <i>Acyrtosiphon pisum</i>         | 2 e-45               | 0,117                                   |
| 44   | 2                 | 255             | 28758,93        | 5,93            | Phosphoglycerate mutase                                          | Q3S2I9                 | <i>Bombyx mori</i>                | 1 e-136              | 0                                       |
| 45   | 3                 | 455             | 49557,89        | 9,42            | Hypothetical conserved protein                                   | D3TQ61                 | <i>Glossina morsitans morsita</i> | 5 e-40               | 0,951                                   |
| 46   | 1                 | 173             | 19702,18        | 5,32            | Heat shock protein hsp21.4                                       | Q5R1P5                 | <i>Bombyx mori</i>                | 2 e-91               | 0                                       |
| 47   | 3                 | 234             | 24849,46        | 5,98            | Triosephosphate isomerase                                        | Q5XUN5                 | <i>Helicoverpa armigera</i>       | 1 e-130              | 0                                       |
| 48   | 4                 | 207             | 23125,65        | 6,2             | Putative peroxiredoxin                                           | A8CWH8                 | <i>Lutzomyia longipalpis</i>      | 5 e-84               | 0,97                                    |
| 49   | 4                 | 148             | 17023,36        | 6,17            | Actin-depolymerizing factor 1Actin-depolymerizing factor 4       | Q1HPP5                 | <i>Bombyx mori</i>                | 1 e-78               | 0                                       |
| 50   | 6                 | 145             | 16619,02        | 6,75            | Ubiquitin carrier protein                                        | Q2Q469                 | <i>Bombyx mori</i>                | 8 e-79               | 0                                       |
| 51   | 2                 | 458             | 51656,67        | 5               | Fructosidase                                                     | B1NLD5                 | <i>Helicoverpa armigera</i>       | 0.0                  | 0,98                                    |
| 52   | 1                 | 119             | 13292,25        | 8,58            | Mobility group protein 1B                                        | Q1HQ86                 | <i>Bombyx mori</i>                | 2 e-57               | 0,003                                   |
| 53   | 1                 | 153             | 15605,48        | 6,17            | Superoxide dismutase [Cu-Zn]                                     | C3RSN1                 | <i>Spodoptera exigua</i>          | 2 e-69               | 0,001                                   |
| 54   | 8                 | 176             | 19790,12        | 9,01            | Nucleoside diphosphate kinase                                    | Q8MUR5                 | <i>Choristoneura parallela</i>    | 4 e-80               | 0,849                                   |
| 55   | 1                 | 65              | 7185,33         | 7,71            | GL27078 Putative oxidoreductase activity                         | B4HAK7                 | <i>Drosophila persimilis</i>      | 8 e-5                | 0                                       |
| 56   | 6                 | 354             | 42077,92        | 8,93            | Arylphorin subunit                                               | Q9U5K4                 | <i>Spodoptera litura</i>          | 1 e-147              | 1,00                                    |
| 57   | ?                 | 335             | 39874,08        | 5,7             | Arylphorin subunit                                               | Q9U5K4                 | <i>Spodoptera litura</i>          | 1 e-165              | 0                                       |
| 58   | 10                | 364             | 39427,81        | 7               | Fructose-bisphosphate aldolase                                   | Q75PQ3                 | <i>Antheraea yamamai</i>          | 0.0                  | 0                                       |
| 59   | 5                 | 366             | 41117,33        | 4,91            | Fructosidase                                                     | B1NLD5                 | <i>Helicoverpa armigera</i>       | 0.0                  | 0                                       |
| 60   | 9                 | 332             | 35554,64        | 7,71            | Glyceraldehyde-3-phosphate dehydrogenase                         | Q1EPM0                 | <i>Bombyx mori</i>                | 1 e-179              | 0,001                                   |
| 61   | 7                 | 332             | 35554,64        | 7,71            | Glyceraldehyde-3-phosphate dehydrogenase                         | Q1EPM0                 | <i>Bombyx mori</i>                | 1 e-179              | 0,001                                   |
| 62   | 4                 | 213             | 24406,48        | 6,96            | GTP-binding nuclear protein Ran                                  | D2CVL0                 | <i>Helicoverpa armigera</i>       | 1 e-122              | 0,002                                   |
| 63   | 2                 | 134             | 14570,82        | 8,48            | Promoting protein                                                | B6A8I6                 | <i>Helicoverpa armigera</i>       | 2 e-36               | 0,999                                   |
| 64   | 5                 | 165             | 17716,09        | 8,45            | Peptidyl-prolyl cis-trans isomerase                              | Q5CCL3                 | <i>Bombyx mori</i>                | 4 e-80               | 0,002                                   |
| 65   | 2                 | 165             | 17716,09        | 8,45            | Peptidyl-prolyl cis-trans isomerase                              | Q5CCL4                 | <i>Bombyx mori</i>                | 5 e-80               | 1                                       |
