# Supplementary material for: Sialome of a Generalist Lepidopteran Herbivore: Identification of Transcripts and Proteins from Helicoverpa armigera Labial Salivary Glands
Source: PLoS One. 2011 Oct 27;6(10):e26676. doi: 10.1371/journal.pone.0026676 (PMC3203145; doi:10.1371/journal.pone.0026676)
Supplement: Table S5 — Identification obtained with the de novo sequenced peptides using MS BLAST. Peptide sequences interpreted de novo from MS/MS spectra were used to query NCBI_insecta, ButterflyBase, or the H. armigera EST database using the MS BLAST search engine. (PDF) [file pone.0026676.s007.pdf]

[illegible]

Page 4

| Site | Design | Task # | Design # | Notes (1) | Notes (2) | Notes (3) | Notes (4) | Notes (5) | Notes (6) | Notes (7) | Notes (8) | Notes (9) | Notes (10) | Notes (11) | Notes (12) | Notes (13) | Notes (14) | Notes (15) | Notes (16) | Notes (17) | Notes (18) | Notes (19) | Notes (20) | Notes (21) | Notes (22) | Notes (23) | Notes (24) | Notes (25) | Notes (26) | Notes (27) | Notes (28) | Notes (29) | Notes (30) | Notes (31) | Notes (32) |  |
|------|--------|--------|----------|-----------|-----------|-----------|-----------|-----------|-----------|-----------|-----------|-----------|------------|------------|------------|------------|------------|------------|------------|------------|------------|------------|------------|------------|------------|------------|------------|------------|------------|------------|------------|------------|------------|------------|------------|--|
|------|--------|--------|----------|-----------|-----------|-----------|-----------|-----------|-----------|-----------|-----------|-----------|------------|------------|------------|------------|------------|------------|------------|------------|------------|------------|------------|------------|------------|------------|------------|------------|------------|------------|------------|------------|------------|------------|------------|--|









Page 9

[illegible]





[illegible]



| Table 1: Data for Table 1 |     |     |             |             |                       |                    |                            |                        |                  |                     |                     |                     |                     |
|---------------------------|-----|-----|-------------|-------------|-----------------------|--------------------|----------------------------|------------------------|------------------|---------------------|---------------------|---------------------|---------------------|
| Year                      | Age | Sex | Height (cm) | Weight (kg) | Body Mass Index (BMI) | Heart Rate (b/min) | Resting Heart Rate (b/min) | Max Heart Rate (b/min) | VO2 Max (ml/min) | VO2 Max (ml/kg/min) | VO2 Max (ml/kg/min) | VO2 Max (ml/kg/min) | VO2 Max (ml/kg/min) |
| 2010                      | 20  | M   | 175</       |             |                       |                    |                            |                        |                  |                     |                     |                     |                     |





[illegible]

[illegible]







[illegible]









[illegible]









| Map 34  |        |        |          |          |             |             |                  |       |     |          |                |     |           |  |
|---------|--------|--------|----------|----------|-------------|-------------|------------------|-------|-----|----------|----------------|-----|-----------|--|
| RA      | Design | Task # | Object # | Delta RA | Decl. J2000 | Length (km) | Orb. Inclination | Epoch | Ref | Position | Orbit/Rotation | Age | Peak Size |  |
| RA-1748 | 1      | 1571-  |          |          |             |             |                  |       |     |          |                |     |           |  |





| New 44      |     |        |         |            |             |            |             |            |             |            |             |            |             |
|-------------|-----|--------|---------|------------|-------------|------------|-------------|------------|-------------|------------|-------------|------------|-------------|
| RA          | Dec | Star # | Prox. # | RA (J2000) | Dec (J2000) |
| 14h 00m 00s | 00  |        |         |            |             |            |             |            |             |            |             |            |             |
